# Supplementary material for: Laser-Induced Graphene-Based Wearable Epidermal Ion-Selective Sensors for Noninvasive Multiplexed Sweat Analysis
Source: MDPI journal article supplement (doi:10.3390/bios12060397), 2022-06-09
Supplement: s1 [file s1]

Article

# Laser-Induced Graphene-Based Wearable Epidermal Ion-Selective Sensors for Noninvasive Multiplexed Sweat Analysis

Jianjun Liao <sup>1</sup>, Xiangya Zhang <sup>1</sup>, Zihan Sun <sup>1</sup>, Hande Chen <sup>2</sup>, Jian Fu <sup>2</sup>, Hewei Si <sup>3</sup>, Chengjun Ge <sup>1</sup> and Shiwei Lin <sup>3,\*</sup>

- <sup>1</sup> Key Laboratory of Agro-Forestry Environmental Processes and Ecological Regulation of Hainan Province, School of Ecological and Environmental Sciences, Hainan University, Haikou 570228, China; liaojianjun008@hainu.edu.cn (J.L.); xiangya94264@gmail.com (X.Z.); zihansun266@gmail.com (Z.S.); 990963@hainanu.edu.cn (C.G.)
  - <sup>2</sup> Hainan Unican Science and Technology Innovation Institute, Haikou 571152, China; chenhande53@gmail.com (H.C.); fujian199702@gmail.com (J.F.)
  - <sup>3</sup> School of Materials Science and Engineering, Hainan University, Haikou 570228, China; linsw@hainu.edu.cn
- \* Correspondence: linsw@hainu.edu.cn

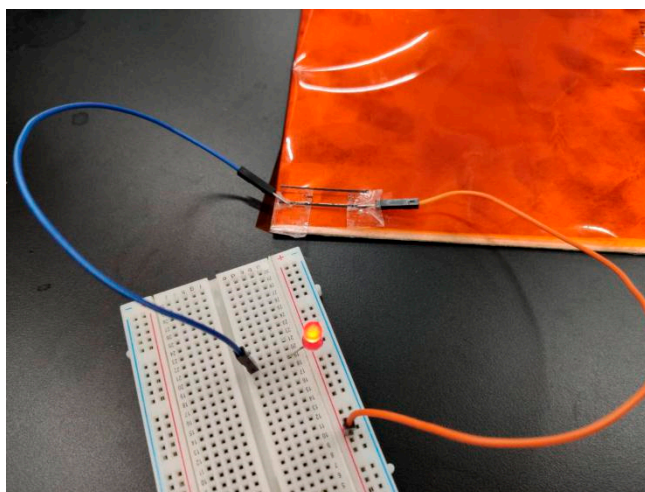

**Figure S1.** A LED bulb could be readily lighted through a LIG conductive wire, indicating good electrical conductivity of LIG.

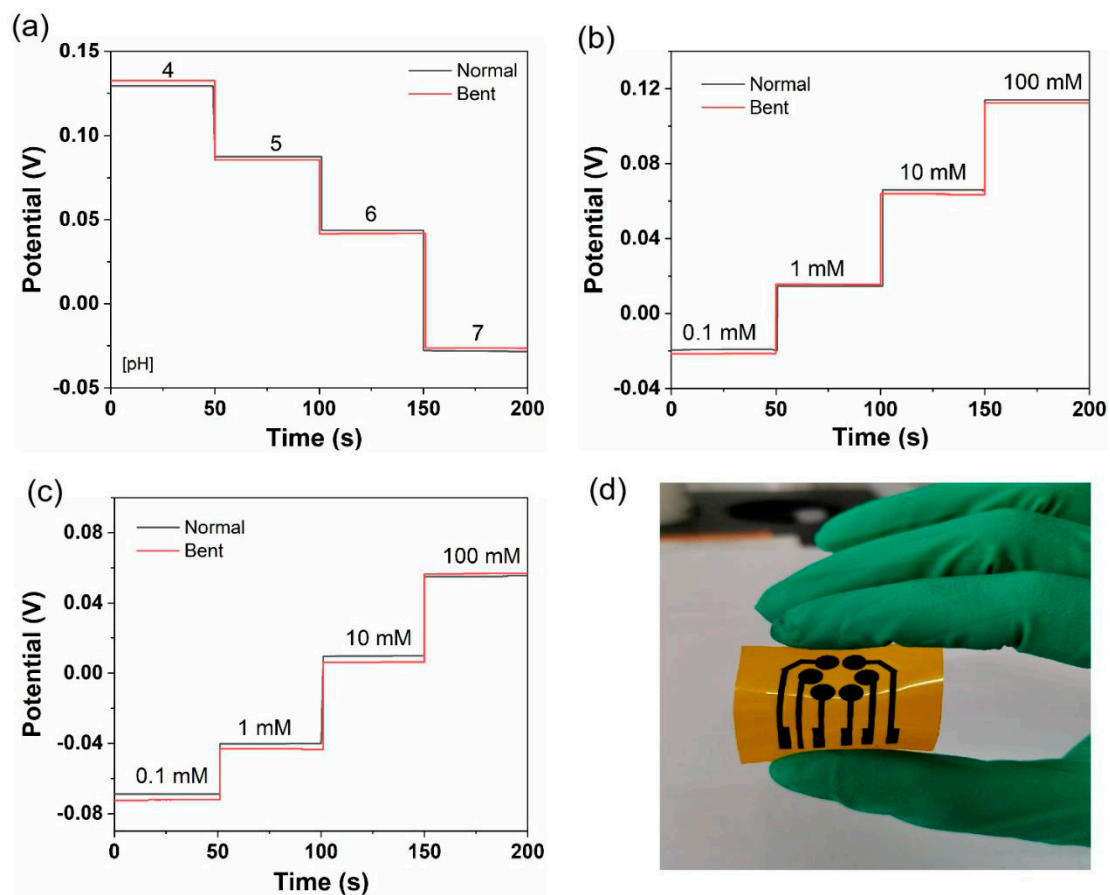

**Figure S2.** (a) pH, (b)  $\text{Na}^+$ , and (c)  $\text{K}^+$  sensing performance of flexible LIG-based sensors under normal and bent states.

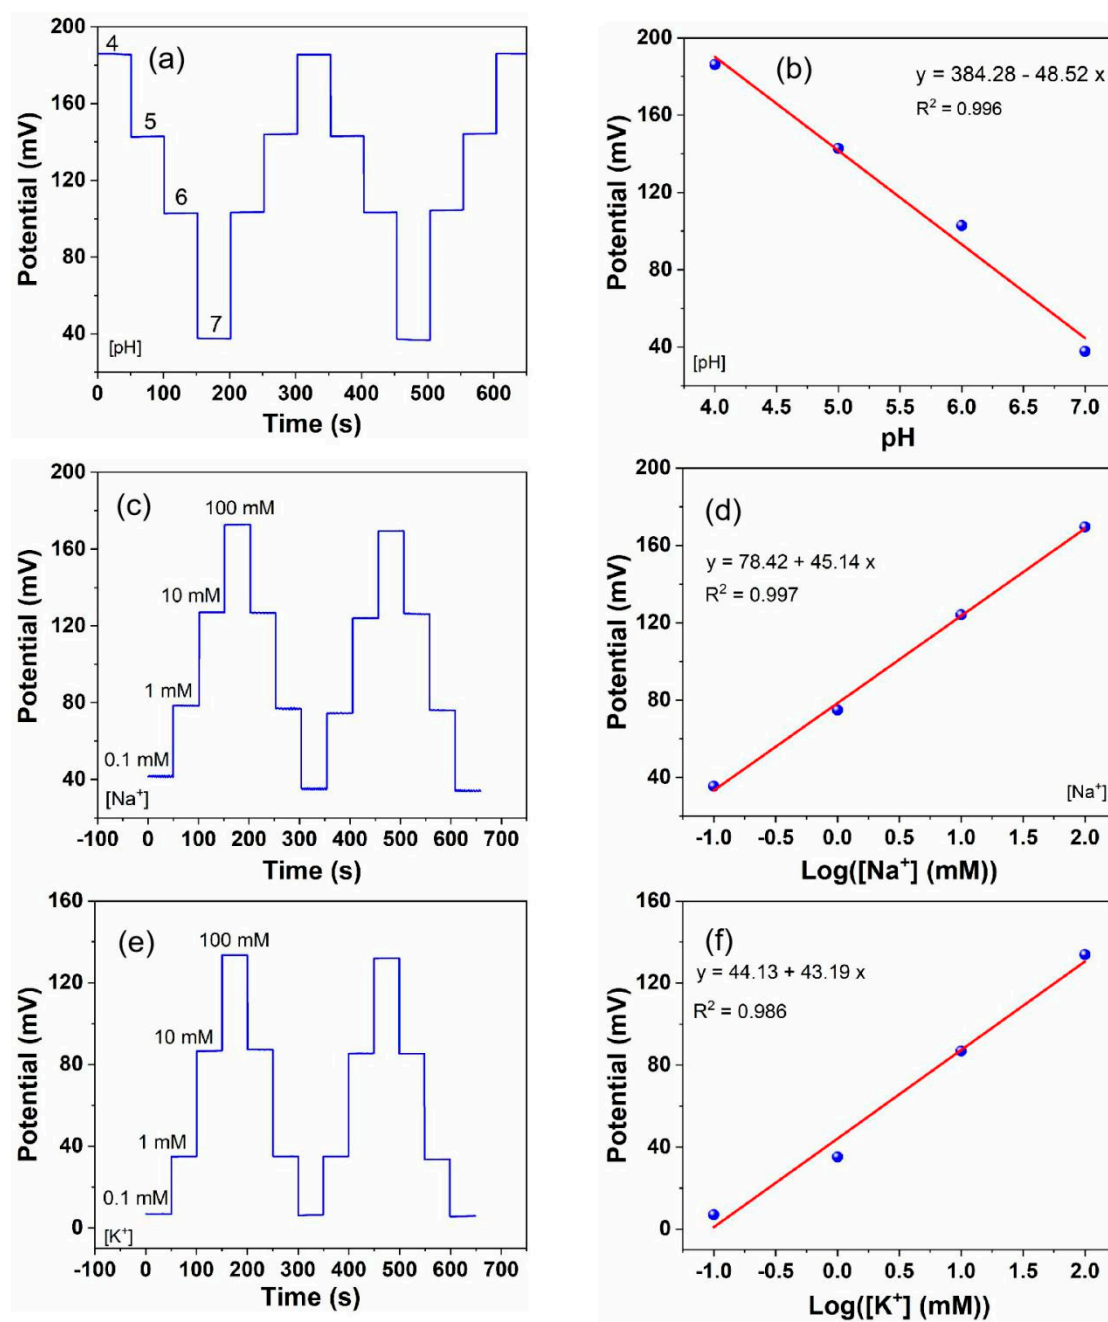

**Figure S3.** (a,b) pH, (c,d) Na<sup>+</sup>, and (e,f) K<sup>+</sup> sensing performance of flexible LIG-based sensors tested on the custom-developed wearable multiplexed sensing system.



**Table S1.** The patterning of  $2 \times 2$  cm squares on PI substrate was tested with different laser speed and power values.

| Laser scribed graphene optimization |     | Max. Laser Power (12W)                                                                                      |                                                                                                              |                                                                                                               |                                                                                      |                                                                                      |
|-------------------------------------|-----|-------------------------------------------------------------------------------------------------------------|--------------------------------------------------------------------------------------------------------------|---------------------------------------------------------------------------------------------------------------|--------------------------------------------------------------------------------------|--------------------------------------------------------------------------------------|
|                                     |     | 50% (6W)                                                                                                    | 55% (6.6W)                                                                                                   | 60% (7.2W)                                                                                                    | 65% (7.8W)                                                                           | 70% (8.4W)                                                                           |
| Laser speed<br>(20 IPS)             | 10% |                            |                            |                            |   |   |
|                                     | 15% | <br>(22 $\Omega$ /square) | <br>(25 $\Omega$ /square) | <br>(23 $\Omega$ /square) |  |  |

|  |     |                                                                                                            |                                                                                                             |                                                                                                              |                                                                                                              |                                                                                                              |
|--|-----|------------------------------------------------------------------------------------------------------------|-------------------------------------------------------------------------------------------------------------|--------------------------------------------------------------------------------------------------------------|--------------------------------------------------------------------------------------------------------------|--------------------------------------------------------------------------------------------------------------|
|  | 20% | 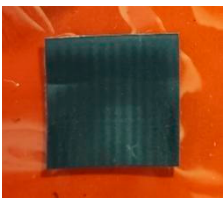<br>(30 $\Omega$ /square) | <br>(28 $\Omega$ /square) | <br>(28 $\Omega$ /square) | <br>(27 $\Omega$ /square) | <br>(33 $\Omega$ /square) |
|--|-----|------------------------------------------------------------------------------------------------------------|-------------------------------------------------------------------------------------------------------------|--------------------------------------------------------------------------------------------------------------|--------------------------------------------------------------------------------------------------------------|--------------------------------------------------------------------------------------------------------------|

**Table S2.** Comparison of the sensing performances of the recently reported sweat sensors with this work.

| Year/Reference | Detection method | Sensitivity                      | Linear range                | Skin wearability | Integration level              | Communication mode |
|----------------|------------------|----------------------------------|-----------------------------|------------------|--------------------------------|--------------------|
| 2021 [1]       | OCP              | pH: 62.5 mV/decade               | pH: 4-8                     | Yes              | No                             | No                 |
|                |                  | Na <sup>+</sup> : 64.4 mV/decade | Na <sup>+</sup> : 10-160 mM |                  |                                |                    |
|                |                  | K <sup>+</sup> : 65.5 mV/decade  | K <sup>+</sup> : 2-32 mM    |                  |                                |                    |
| 2018 [2]       | OCP              | pH: --                           | pH: 4-7                     | Yes              | Yes<br>☑Circuit<br>☑Smartphone | Bluetooth          |
|                |                  | Na <sup>+</sup> : 45.8 mV/decade | Na <sup>+</sup> : 10-160 mM |                  |                                |                    |
|                |                  | K <sup>+</sup> : 35.9 mV/decade  | K <sup>+</sup> : 2-32 mM    |                  |                                |                    |
| 2021 [3]       | OCP              | Na <sup>+</sup> : 50.3 mV/decade | Na <sup>+</sup> : 0.1-10 mM | NO               | NO                             | NO                 |

|          |     |                                  |                               |     |             |           |
|----------|-----|----------------------------------|-------------------------------|-----|-------------|-----------|
|          |     | K <sup>+</sup> : 53.5 mV/decade  | K <sup>+</sup> : 0.1-10 mM    |     |             |           |
| 2018 [4] | OCP | pH: 71.44 mV/decade              | pH: 4-8                       | Yes | Yes         | Bluetooth |
|          |     |                                  |                               |     | ☑Circuit    |           |
|          |     |                                  |                               |     | ☑Smartphone |           |
| 2014 [5] | OCP | Na <sup>+</sup> :63.75 mV/decade | Na <sup>+</sup> : 0.1-100mM   | Yes | Yes         | Bluetooth |
|          |     |                                  |                               |     | ☑Circuit    |           |
|          |     |                                  |                               |     | ☑PC         |           |
| 2016 [6] | OCP | Na <sup>+</sup> :64.2 mV/decade  | Na <sup>+</sup> : 10-160mM    | Yes | Yes         | Bluetooth |
|          |     | K <sup>+</sup> : 61.3 mV/decade  | K <sup>+</sup> : 1-32mM       |     | ☑Circuit    |           |
|          |     |                                  |                               |     | ☑Smartphone |           |
| 2020 [7] | OCP | Na <sup>+</sup> : 56.4 mV/decade | Na <sup>+</sup> : 0.0001-10mM | Yes | Yes         | Bluetooth |
|          |     | K <sup>+</sup> : 54.3 mV/decade  | K <sup>+</sup> : 0.0001-10mM  |     | ☑Circuit    |           |
|          |     |                                  |                               |     | ☑Laptop     |           |
| 2021 [8] | OCP | pH: 79 mV/decade                 | pH: 3-8                       | NO  | Yes         | NO        |
| 2021 [9] | OCP | Na <sup>+</sup> : 55.5 mV/decade | Na <sup>+</sup> : 1-1000mM    | Yes | Yes         | Bluetooth |



---

|                  |            |                                       |                                  |            |                                                |                  |
|------------------|------------|---------------------------------------|----------------------------------|------------|------------------------------------------------|------------------|
|                  |            |                                       |                                  |            | <input checked="" type="checkbox"/> Circuit    |                  |
|                  |            |                                       |                                  |            | <input checked="" type="checkbox"/> Smartphone |                  |
| <b>This work</b> | <b>OCP</b> | <b>pH: 51.5 mV/decade</b>             | <b>pH: 4-7</b>                   | <b>Yes</b> | <b>Yes</b>                                     | <b>Bluetooth</b> |
|                  |            | <b>Na<sup>+</sup>: 45.4 mV/decade</b> | <b>Na<sup>+</sup>: 0.1-100mM</b> |            | <input checked="" type="checkbox"/> Circuit    |                  |
|                  |            | <b>K<sup>+</sup>: 43.3 mV/decade</b>  | <b>K<sup>+</sup>: 0.1-100mM</b>  |            | <input checked="" type="checkbox"/> Smartphone |                  |

---

## References

- [1] B. Paul, S. Demuru, C. Lafaye, M. Saubade, D. Briand, Printed Iontophoretic-Integrated Wearable Micro-fluidic Sweat-Sensing Patch for On-Demand Point-Of-Care Sweat Analysis, *Adv. Mater. Technol.* 2021, 2000910.
- [2] L. Wang, L. Wang, Y. Zhang, J. Pan, S. Li, X. Sun, et al., Weaving Sensing Fibers into Electrochemical Fabric for Real-Time Health Monitoring, *Adv. Funct. Mater.* 2018, 28, 1804456.
- [3] F. Wang, Y. Liu, M. Zhang, F. Zhang, P. He, Home Detection Technique for Na<sup>+</sup> and K<sup>+</sup> in Urine Using a Self-Calibrated all-Solid-State Ion-Selective Electrode Array Based on Polystyrene-Au Ion-Sensing Nanocomposites, *Anal. Chem.* 2021, 93, 8318-8325.
- [4] S.Y. Oh, S.Y. Hong, Y.R. Jeong, J. Yun, H. Park, S.W. Jin, et al., Skin-Attachable, Stretchable Electrochemical Sweat Sensor for Glucose and pH Detection, *ACS Appl. Mater. Interfaces* 2018, 10, 13729-13740.
- [5] A.J. Bandodkar, D. Molinnus, O. Mirza, T. Guinovart, J.R. Windmiller, G. Valdés-Ramírez, et al., Epidermal tattoo potentiometric sodium sensors with wireless signal transduction for continuous non-invasive sweat monitoring, *Biosens. Bioelectron.* 2014, 54, 603-609.
- [6] W. Gao, S. Emaminejad, H.Y.Y. Nyein, S. Challa, K. Chen, A. Peck, et al., Fully integrated wearable sensor arrays for multiplexed in situ perspiration analysis, *Nature* 2016, 529, 509-514.
- [7] P. Pirovano, M. Dorrian, A. Shinde, A. Donohoe, A.J. Brady, N.M. Moyna, et al., A wearable sensor for the detection of sodium and potassium in human sweat during exercise, *Talanta* 2020, 219, 121145.
- [8] V. Mazzaracchio, L. Fiore, S. Nappi, G. Marrocco, F. Arduini, Medium-distance affordable, flexible and wireless epidermal sensor for pH monitoring in sweat, *Talanta* 2021, 222, 121502.
- [9] H.-R. Lim, Y. Lee, K.A. Jones, Y.-T. Kwon, S. Kwon, M. Mahmood, et al., All-in-one, wireless, fully flexible sodium sensor system with integrated Au/CNT/Au nanocomposites, *Sens. Actuators, B* 2021, 331, 129416.
